# Supplementary material for: Myelodysplastic Syndrome associated TET2 mutations affect NK cell function and genome methylation
Source: PubMed Central journal article supplement (PMC9898569; doi:10.1038/s41467-023-36193-w), 2023-02-03
Supplement: 41467_2023_36193_MOESM1_ESM.pdf [file 41467_2023_36193_MOESM1_ESM.pdf]

# Myelodysplastic Syndrome associated TET2 mutations affect NK cell function and genome methylation

## Supplementary Information

**Supplementary Figure 1.** KIR expression on CD3<sup>+</sup> T cells in MDS/CMML patients according to the presence or absence of *TET2/IDH* mutations.

**Supplementary Figure 2.** Expression of KIR2D, NKG2A and Perforin in blood NK cells without specific treatments.

**Supplementary Figure 3.** Percentages of NK cells positive for various KIR molecules in *TET2/IDH*<sup>WT</sup> and *TET2/IDH*<sup>MUT</sup> MDS patients.

**Supplementary Figure 4.** KIR and Perforin correlation in MDS/CMML patients with *TET2/IDH* mutations.

**Supplementary Figure 5.** Fraction of Perforin positive NK cells according to KIR expression.

**Supplementary Figure 6.** Mutational landscape in the MDS/CMML cohort.

**Supplementary Figure 7.** Percentage of VAF in the WMC, sorted NK/T cells and KIR<sup>+</sup> and KIR<sup>-</sup> NK cells at diagnosis.

**Supplementary Figure 8.** Percentages of KIR2D<sup>+</sup> NK cells in healthy donors, *TET2*<sup>WT</sup> and *TET2*<sup>MUT</sup> MDS patients after *in vitro* treatment.

**Supplementary Figure 9.** NK cells phenotyping.

**Supplementary Figure 10.** Flow Chart.

**Supplementary Figure 11.** Analysis of KIR2DL1 proximal promoter and localization of primer used for CHIP and luciferase vector construction.

**Supplementary Table 1.** Circulating NK cells phenotyping.

**Supplementary Table 2.** Specific KIR Locus phenotyping and NKG2A in circulating NK cells.

**Supplementary Table 3.** KIR Locus genotyping on 22 MDS/CMML patients.

**Supplementary Table 4.** List of 80 genes for targeted Next-Generation Sequencing.

**Supplementary Table 5.** Mutations association in the whole cohort according to *TET2/IDH* mutations.

**Supplementary Table 6.** NGS at diagnosis in WMC and in NK/T sorted cells.

**Supplementary Table 7.** Patients' characteristics.

**Supplementary Table 8.** Patients of the Clinical Trial NCT02985190.

**Supplementary Table 9.** List of Antibodies used for Flow Cytometry.

**Supplementary Table 10.** List of primers used for the ChIP-qPCR assay.

**Supplementary Table 11.** Specificities and probes used in the Multiplex RT-PCR analysis.

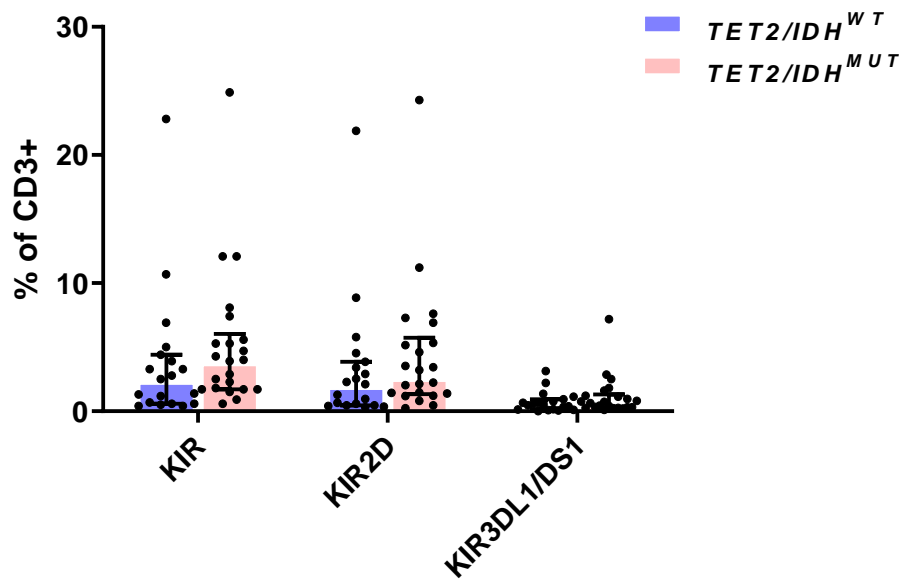

**Supplementary Figure 1. KIR expression on CD3<sup>+</sup> T cells in MDS/CMML patients according to the presence or absence of *TET2/IDH* mutations.** Representation of the KIR, KIR2D and KIR3DL1/DS1 expression in blood CD3<sup>+</sup> T cells of *TET2/IDH*<sup>WT</sup> (n=19) and *TET2/IDH*<sup>MUT</sup> (n=22). For all the analysis, median is represented, and error bars represents interquartile range. KIR = (KIR2D+ KIR3DL1/DS1-, KIR2D+ KIR3DL1/DS1+ and KIR2D- KIR3DL1/DS1+)

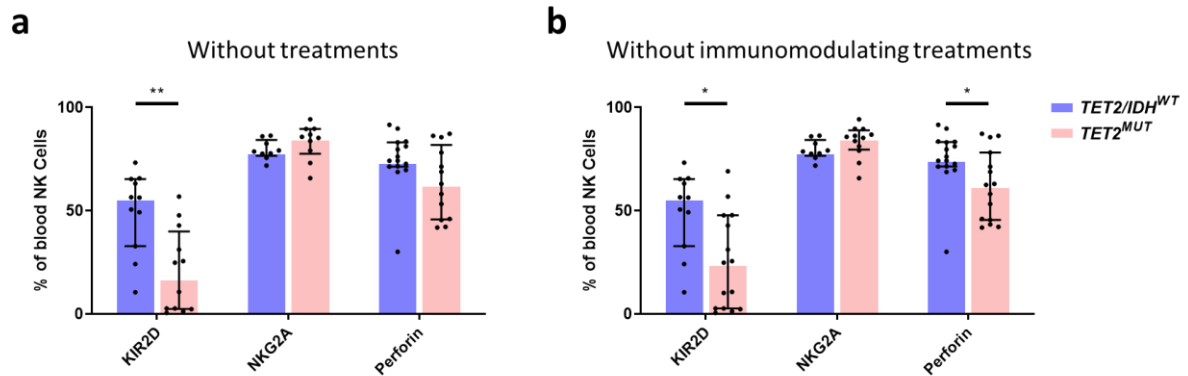

**Supplementary Figure 2. Expression of KIR2D, NKG2A and Perforin in blood NK cells in absence of treatments.** Expression of KIR2D, NKG2A and perforin in blood NK cells has been quantified by flow-cytometry. (a) markers expressions were analyzed in comparing  $TET2/IDH^{WT}$  (n=11 for KIR2D, n=9 for NKG2A n=15 for perforin) and  $TET2^{MUT}$  (n=13 for KIR2D, n=11 for NKG2A, n=13 for perforin) MDS patients in absence of any treatment. Statistics were calculated with the nonparametric Mann-Whitney test, two-sided, \*\* p=0.0036. (b) A similar analysis has been performed in  $TET2/IDH^{WT}$  (n=11 for KIR2D, n=9 for NKG2A, n=16 for perforin) or  $TET2^{MUT}$  (n=15, n=12 for NKG2A) MDS patients in absence of immunomodulating treatments. Data are presented as medians and interquartile ranges. Statistics were calculated with the two-sided nonparametric Mann-Whitney test, \*p=0.0305, \*\* p=0.0092.

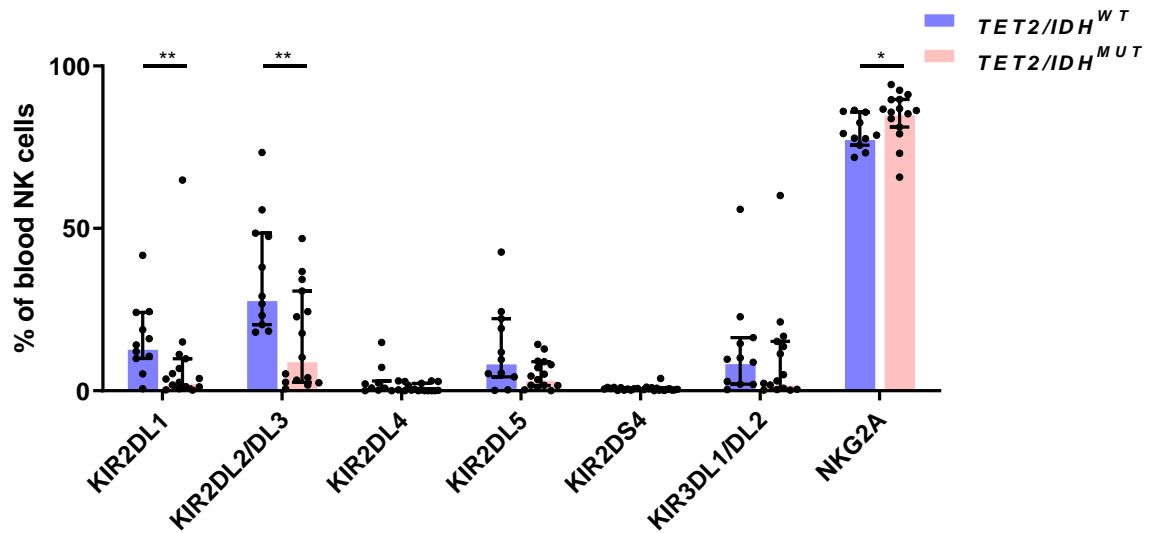

**Supplementary Figure 3. Percentages of NK cells positive for various KIR molecules in *TET2/IDH*<sup>WT</sup> and *TET2/IDH*<sup>MUT</sup> MDS patients.** *TET2/IDH*<sup>WT</sup> (n= 11) are represented by blue bar and *TET2/IDH*<sup>MUT</sup> (n=15) are represented by red bar. Data are presented as medians and interquartile ranges. Statistics were calculated with the two-sided nonparametric Mann-Whitney test. KIR2DL1: \*\* p=0.0092, KIR2DL2/L3: \*\* p=0.0077, NKG2A: \* p=0.0246.

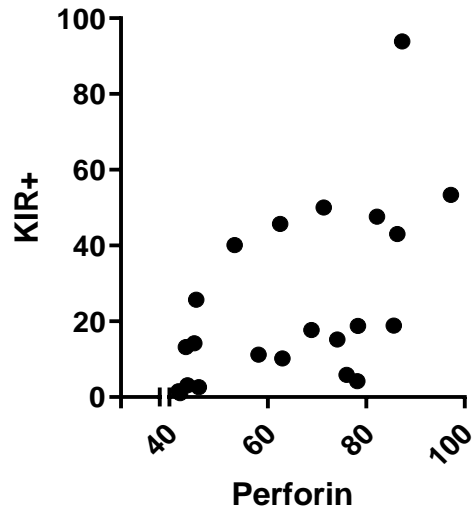

**Supplementary Figure 4. KIR and Perforin correlation in MDS/CMML patients with *TET2/IDH* mutations.** Correlation between the % of KIR (KIR2D+ KIR3DL1/DS1-, KIR2D+ KIR3DL1/DS1+ and KIR2D- KIR3DL1/DS1+) expressing NK cells and the % of Perforin expressing NK cells in *TET2/IDH<sup>MUT</sup>* MDS/CMML patients (n=22). The nonparametric Spearman's rank-order correlation, two-sided, has been used,  $r = 0.651$   $p = 0.001$ .

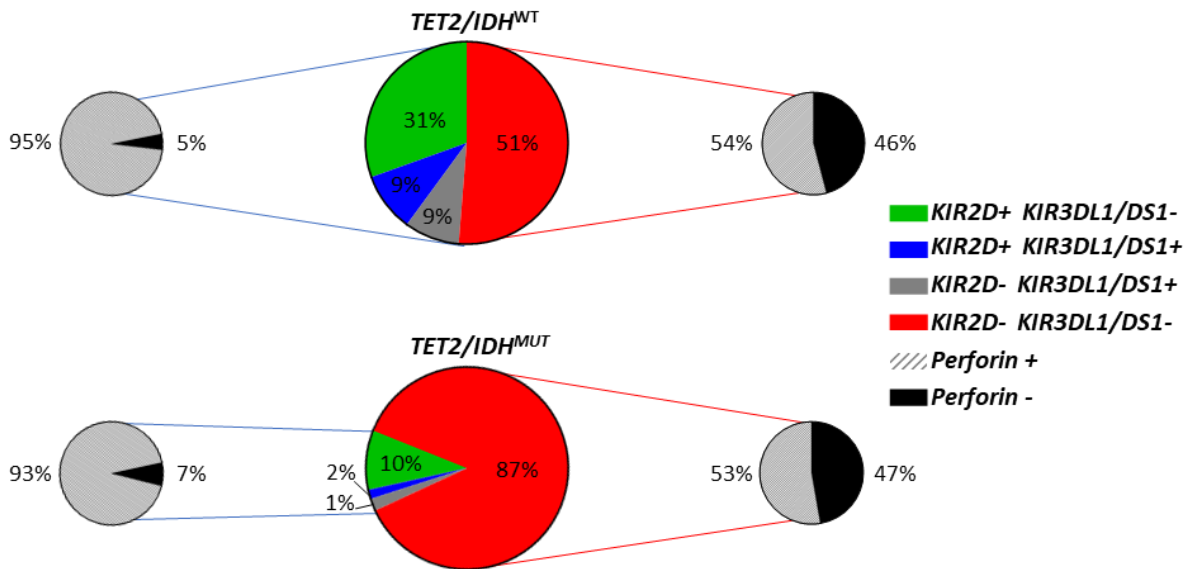

**Supplementary Figure 5. Fraction of Perforin positive NK cells according to KIR expression.** Central pie charts represent the expression of KIR molecules on blood NK cells in *TET2/IDH<sup>WT</sup>* (n=19) and *TET2/IDH<sup>MUT</sup>* (n=22). Lateral pie charts represent the percentage of Perforin positive and negative cells in KIR+ (left) and KIR- (right) NK cells. KIR (KIR2D+ KIR3DL1/DS1-, KIR2D+ KIR3DL1/DS1+ and KIR2D- KIR3DL1/DS1+)

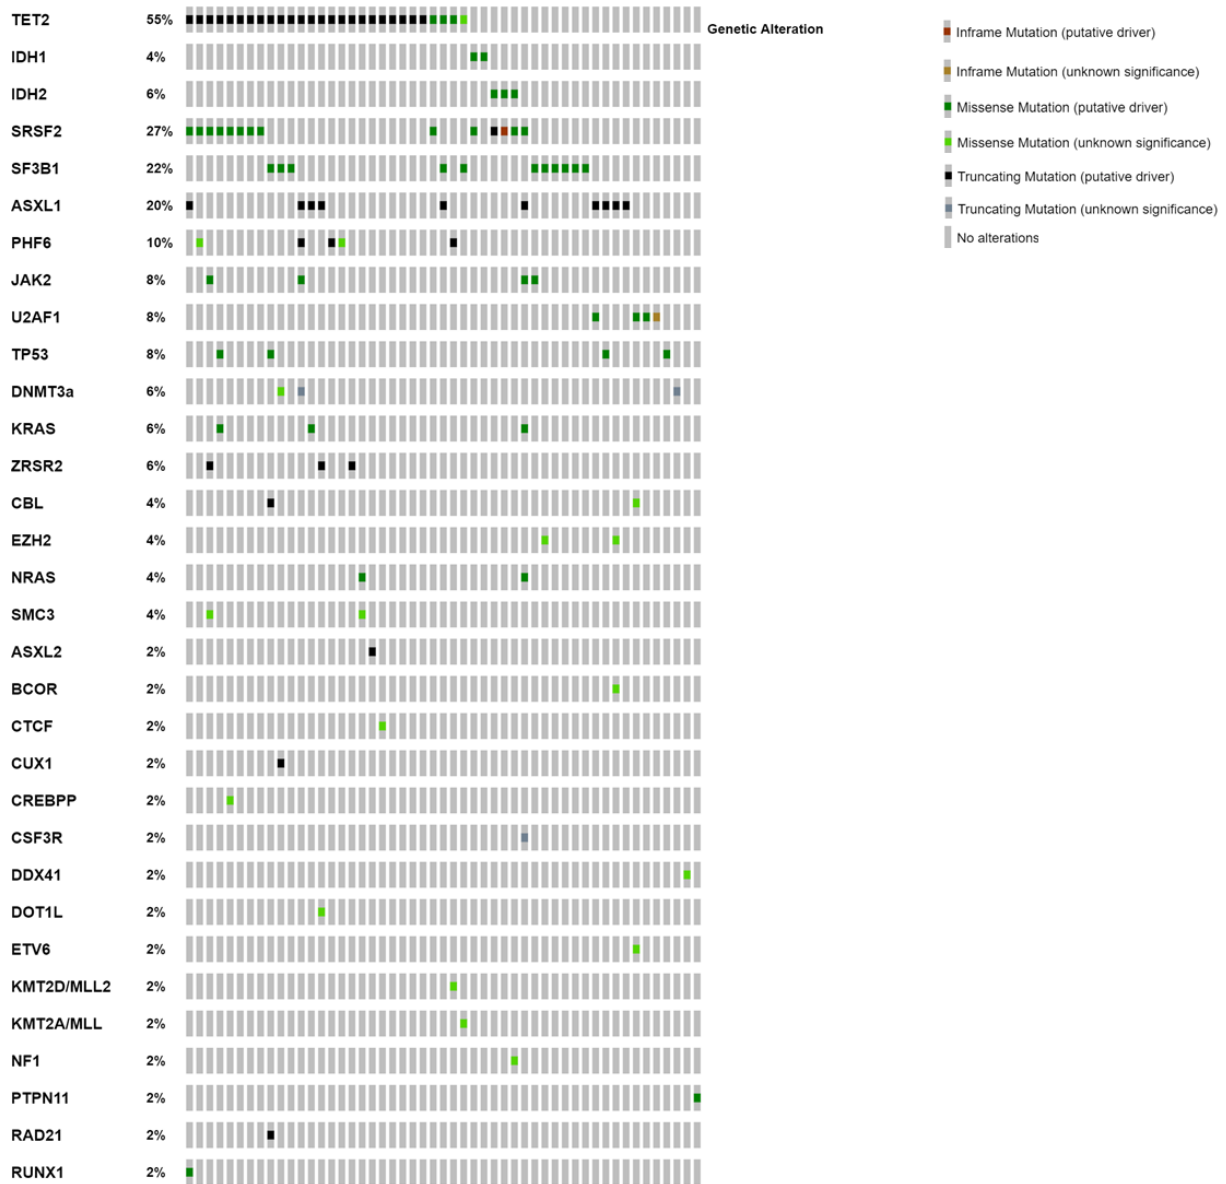

**Supplementary Figure 6. Mutational landscape in the MDS/CMML cohort.** Mutational Landscape of the 51 patients carrying mutation in at least one of the 80 genes analyzed by NGS.

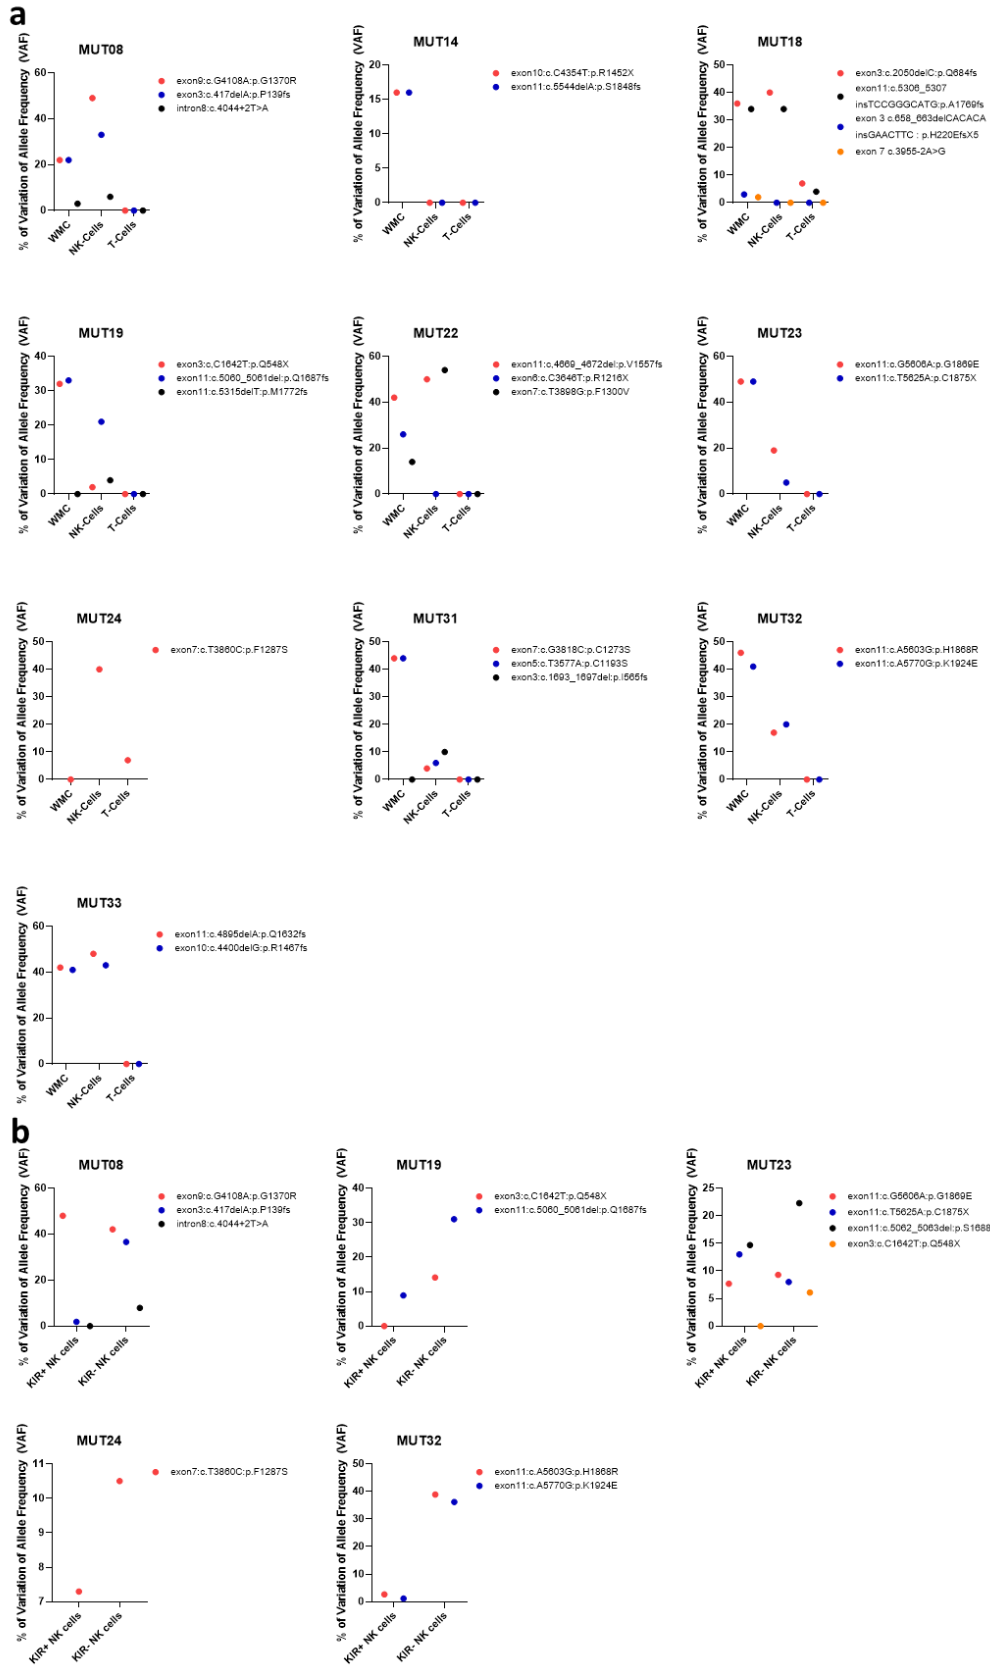

**Supplementary Figure 7. Percentage of VAF in the WMC, sorted NK/T cells and KIR+ and KIR- NK cells at diagnosis.** The percentage of Variant Allele Frequency (VAF) in the WMC and in sorted NK/T cells (a) or in KIR+ and KIR- NK cells (b) at diagnosis. WMC, White mononuclear cell.



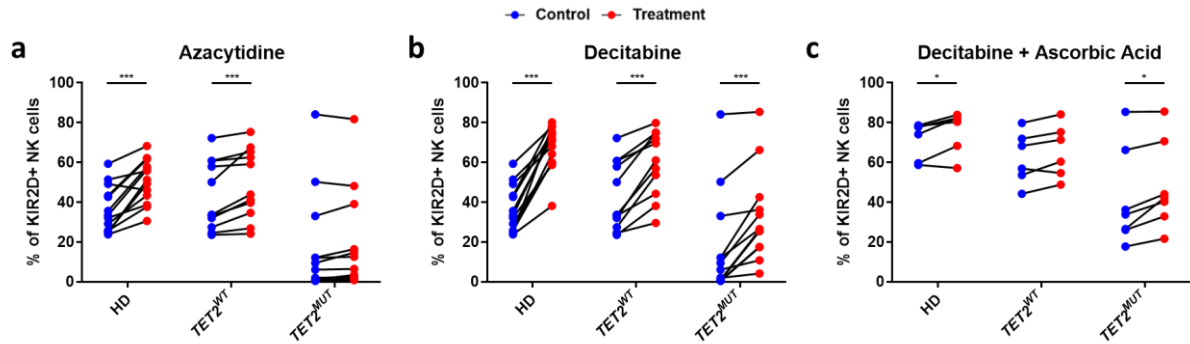

**Supplementary Figure 8. Percentages of KIR2D+ NK cells in healthy donors, TET2<sup>WT</sup> and TET2<sup>MUT</sup> MDS patients after *in vitro* treatment.** NK cells from healthy donors (n=13, n=7 for Decitabine + Acid Ascorbic), TET2<sup>WT</sup> (n=11, n=6 for Decitabine + Acid Ascorbic), and TET2<sup>MUT</sup> (n=12, n=7 for Decitabine + Acid Ascorbic) MDS patients were treated 5 days with (a) Azacytidine (0.5 $\mu$ M), (b) Decitabine (0.5 $\mu$ M), and (c) Decitabine supplemented with Ascorbic Acid (125 $\mu$ M). Blue dots show the basal KIR2D expression in presence of DMSO for the test with Azacytidine or Decitabine alone, or in presence of Decitabine alone for the test with ascorbic acid. Red dots show KIR2D expression after the different treatments. Non-parametric two-sided Wilcoxon paired-test has been performed. Azacytidine treatment: \*\*\*p=0.005 for HD, and \*\*\* p=0.001 for TET2<sup>WT</sup>. Decitabine treatment: \*\*\* p=0.0002 for HD, \*\*\* p=0.001 for TET2<sup>WT</sup> and \*\*\* p=0.005 TET2<sup>MUT</sup>. For Decitabine + Ascorbic Acid treatment: \* p=0.0313 and \* p=0.0156 for HD and TET2<sup>MUT</sup> respectively.

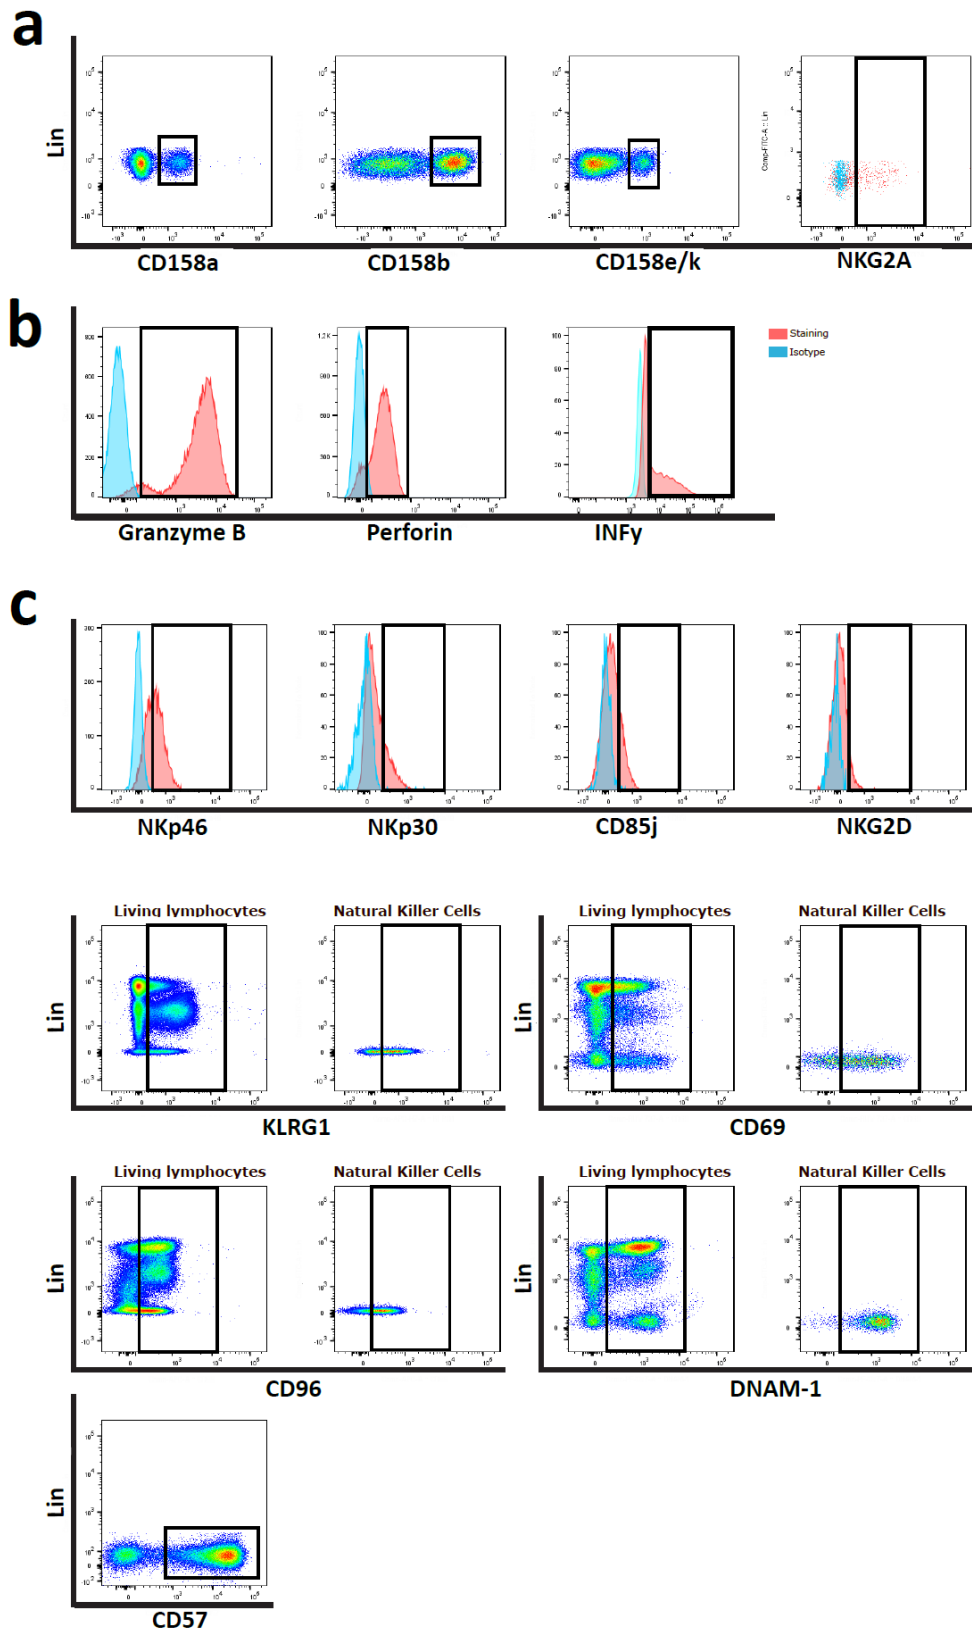

**Supplementary Figure 9. NK cells phenotyping.** Gating strategy of KIR phenotyping (a), Perforin/Granzyme B/IFN- $\gamma$  (b) and general phenotype (c) of NK cells (Fig 1, 2C, 3B, 5D, 6).

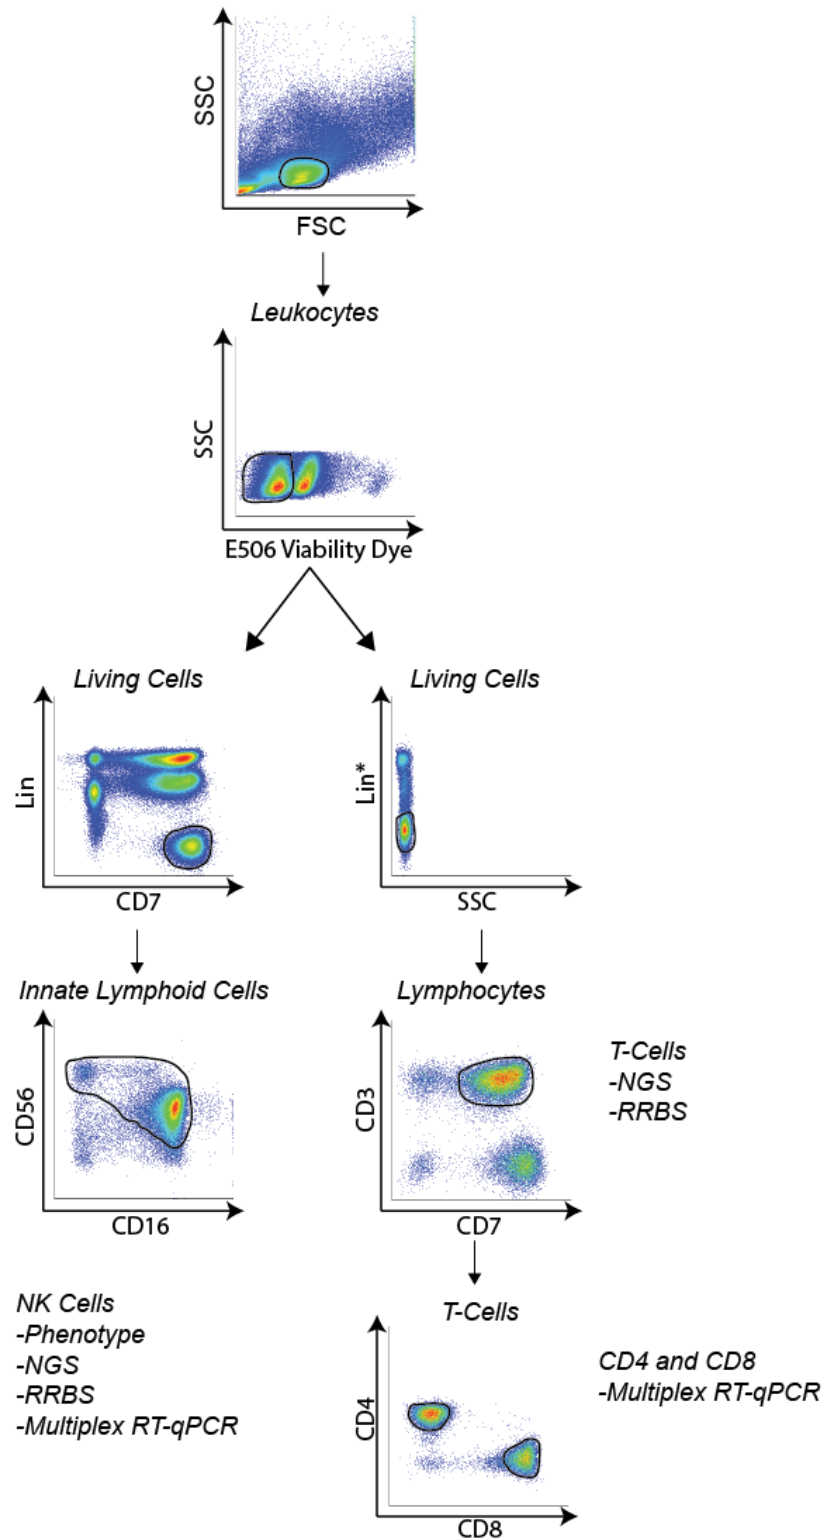

**Supplementary Figure 10. Flow Chart.** Flow cytometry chart deciphering the main gating strategy used to phenotype NK cells (Fig. 1, 2C, 3B, 5D, 6), or to sort NK and T cells (Fig 2A, 2B, 2D, 3F-H, 4, 5A-C).



**Supplementary Table 1. Circulating NK cells phenotyping.**

|                                       | <b>HD (n=23)</b> | <b>MDS/CMML (n=33)</b> | <b>p=</b> | <b>TET2/IDH<sup>WT</sup> (n=13)</b> | <b>TET2/IDH<sup>MUT</sup> (n=19)</b> | <b>p=</b> |
|---------------------------------------|------------------|------------------------|-----------|-------------------------------------|--------------------------------------|-----------|
|                                       | Median [range] % | Median [range] %       |           | Median [range] %                    | Median [range] %                     |           |
| <b>NK cells</b>                       |                  |                        |           |                                     |                                      |           |
| DNAM-1                                | 96.2 [37.8-99.8] | 90.5 [14.7-99.2]       | 0.0109    | 94.4 [14.7-99.2]                    | 87.8 [33.7-98.8]                     |           |
| NKG2D                                 | 65.4 [33.5-85.8] | 61.4 [29-90.5]         |           | 62.9 [39.9-87.4]                    | 59.9 [29-90.5]                       |           |
| NKp30                                 | 78.6 [33.6-95.5] | 79.5 [31.6-99.5]       |           | 81.1 [62-99]                        | 74.5 [31.6-99.5]                     |           |
| NKp46                                 | 33.2 [9.04-65.5] | 37 [11.2-93.5]         | 0.0483    | 39.2 [15.6-93.5]                    | 34.7 [11.2-90.3]                     |           |
| CD85j                                 | 24.9 [5.56-76.5] | 25.6 [11.7-76.5]       |           | 23.4 [11.7-56.9]                    | 29.3 [13.7-76.5]                     |           |
| CD96                                  | 5.51 [0.95-21.8] | 11 [2.8-42.9]          | 0.0006    | 9.06 [5.67-42.9]                    | 11.2 [2.8-41.4]                      |           |
| KIR2D                                 | 54.8 [33.3-76.8] | 31.2 [0.58-77.7]       | 0.0034    | 56.5 [10.5-77.7]                    | 11.9 [0.58-69.1]                     | 0.0005    |
| CD57                                  | 63.2 [28.1-81]   | 60.1 [4.87-95.1]       |           | 63.1 [18.8-95.1]                    | 58.9[4.87-85.6]                      |           |
| KLRG1                                 | 21.9 [9.2-73.3]  | 29 [2.56-96.5]         |           | 26 [6.7-76]                         | 38.5 [2.56-96.5]                     |           |
| CD69                                  | 20.9 [8.69-81.7] | 24.8 [3.85-82.7]       |           | 47.7 [4.01-82.7]                    | 23.6 [3.85-73.5]                     |           |
| <b>CD56<sup>Dim</sup> NK cells</b>    |                  |                        |           |                                     |                                      |           |
| DNAM-1                                | 96.1 [39.3-99.8] | 87.9 [13.9-99.2]       | 0.0038    | 94.5 [13.9-99.2]                    | 86.6 [33.7-98.7]                     |           |
| NKG2D                                 | 66 [33.8-86.7]   | 61.3 [29.1-89.9]       |           | 62.3 [39.9-87.3]                    | 60.6 [29.1-89.9]                     |           |
| NKp30                                 | 68 [33.8-96.3]   | 79.4 [29.6-99.8]       |           | 83.6 [59.9-99]                      | 73.7 [31-99.8]                       |           |
| NKp46                                 | 28.5 [8.07-56.6] | 35.1 [10.5-93.1]       | 0.0493    | 38.4 [10.7-93.1]                    | 34.4 [10.5-89.9]                     |           |
| CD85j                                 | 21.4 [5.72-75]   | 26.1 [11-76.9]         |           | 23.4 [11-57.1]                      | 28.8 [14-76.9]                       |           |
| CD96                                  | 4.32 [0.65-23.2] | 10.9 [2.66-42]         | 0.0001    | 8.77 [4.53-37.5]                    | 11.5 [2.66-41.6]                     |           |
| KIR2D                                 | 60.8 [37-80]     | 35.1 [0.63-82.3]       | 0.0009    | 60 [10.7-82.3]                      | 17.9 [0.63-71.2]                     | 0.0004    |
| CD57                                  | 67 [37.2-84.5]   | 64.1 [5.76-86.5]       |           | 69.6 [20.1-95.9]                    | 60.7 [5.76-86.5]                     |           |
| KLRG1                                 | 30.1 [9.54-79.2] | 35.1 [2.31-98.3]       |           | 27.5 [6.85-80.1]                    | 41.7 [2.31-98.3]                     |           |
| CD69                                  | 20 [8.88-84.9]   | 25.4 [3.8-83.1]        |           | 49.6 [3.8-83.1]                     | 23.8 [4.13-76]                       |           |
| <b>CD56<sup>Bright</sup> NK cells</b> |                  |                        |           |                                     |                                      |           |
| DNAM-1                                | 97.5 [8.26-99.9] | 90.4 [21.2-99.6]       | 0.0037    | 92.3 [21.2-99.6]                    | 89 [33.7-96.6]                       |           |
| NKG2D                                 | 64.6 [19.9-96.8] | 83.1 [19.7-97.7]       | 0.0046    | 88.9 [58.4-95.1]                    | 79.2 [19.7-97.7]                     |           |
| NKp30                                 | 63 [20.3-93.8]   | 81.2 [29-98.5]         | 0.0029    | 79 [45.3-98.5]                      | 84.4 [29-97.1]                       |           |
| NKp46                                 | 62.1 [10.7-85.5] | 64.5 [34-99.1]         |           | 63.9 [39.7-98.5]                    | 64.5 [34-99.1]                       |           |
| CD85j                                 | 24.7 [2.33-82.1] | 25.7 [12.1-68.1]       |           | 22.4 [13.8-64]                      | 31 [12.1-68.1]                       |           |
| CD96                                  | 11 [3.28-29.6]   | 17.4 [2.48-54.5]       | 0.0182    | 33.5 [14.7-54.5]                    | 15.2 [2.48-42.6]                     | 0.0045    |
| KIR2D                                 | 6.27 [3.07-17.8] | 6.55 [0-40.9]          |           | 14.1 [3.34-40.9]                    | 1.76 [0-26.2]                        | 0.0035    |
| CD57                                  | 3.51 [0.21-38.1] | 3.8 [0.18-83.1]        |           | 3.64 [1.52-83.1]                    | 4.58 [0.18-47.7]                     |           |
| KLRG1                                 | 7.2 [2.33-26.8]  | 15.8 [3.16-78.3]       | 0.0012    | 10.2 [4.97-42.1]                    | 20.4 [3.16-78.3]                     |           |
| CD69                                  | 5.43 [1.72-35.1] | 19.7 [2.34-78.5]       | <0.0001   | 17.9 [6.05-78.5]                    | 22.3 [2.34-66.1]                     |           |

Unpaired statistics analysis has been realized by using nonparametric Mann Whitney test two sided.

**Supplementary Table 2. Specific KIR Locus phenotyping and NKG2A in circulating NK cells.**

|                    | <i>TET2/IDH<sup>WT</sup></i> (n=11) | <i>TET2/IDH<sup>MUT</sup></i> (n=15) | p=     |
|--------------------|-------------------------------------|--------------------------------------|--------|
|                    | Median [range] %                    | Median [range] %                     |        |
| <b>KIR2DL1</b>     | 14.1 [0.65-41.7]                    | 3.63 [0.2-64.9]                      | 0.0092 |
| <b>KIR2DL2/DL3</b> | 29.1 [18-73.4]                      | 10.3 [0.62-46.9]                     | 0.0077 |
| <b>KIR3DL1/DL2</b> | 9.71 [0.34-55.9]                    | 3.08 [0.18-60.1]                     |        |
| <b>NKG2A</b>       | 78.7 [71.9-86.4]                    | 86.3 [65.8-9.3]                      | 0.0246 |

Unpaired statistics analysis has been realized by using nonparametric Mann Whitney test two sided.

**Supplementary Table 3. KIR Locus genotyping on 22 MDS/CMML patients**

| Identifiant | 2DL1 | 2DL2 | 2DL3 | 2DL4 | 2DL5 | 3DL1 | 3DL2 | 3DL3 | 2DS1 | 2DS2 | 2DS3 | 2DS4 | 1D (2DS4v) | 2DS5 | 3DS1 | Genotype KIR |
|-------------|------|------|------|------|------|------|------|------|------|------|------|------|------------|------|------|--------------|
| MUT01       | +    | -    | +    | +    | -    | +    | +    | +    | -    | -    | -    | -    | +          | -    | -    | AA           |
| WT03        | +    | +    | +    | +    | -    | +    | +    | +    | -    | +    | -    | -    | +          | -    | -    | AB           |
| WT04        | +    | +    | +    | +    | -    | +    | +    | +    | -    | +    | -    | +    | +          | -    | -    | AB           |
| WT05        | +    | +    | +    | +    | +    | +    | +    | +    | +    | +    | +    | -    | +          | +    | +    | AB           |
| MUT07       | +    | +    | +    | +    | +    | +    | +    | +    | -    | +    | +    | +    | +          | -    | -    | AB           |
| WT08        | +    | +    | +    | +    | -    | +    | +    | +    | -    | +    | -    | +    | +          | -    | -    | AB           |
| MUT08       | +    | +    | +    | +    | -    | +    | +    | +    | -    | +    | -    | -    | +          | -    | -    | AB           |
| MUT14       | +    | -    | +    | +    | -    | +    | +    | +    | -    | -    | -    | +    | +          | -    | -    | AA           |
| MUT15       | +    | +    | +    | +    | +    | +    | +    | +    | +    | +    | -    | +    | -          | +    | +    | AB           |
| MUT16       | +    | +    | +    | +    | -    | +    | +    | +    | -    | +    | -    | +    | +          | -    | -    | AB           |
| WT13        | +    | -    | +    | +    | -    | +    | +    | +    | -    | -    | -    | -    | +          | -    | -    | AA           |
| WT14        | +    | +    | +    | +    | +    | +    | +    | +    | -    | +    | +    | -    | +          | -    | -    | AB           |
| WT15        | +    | -    | +    | +    | +    | +    | +    | +    | +    | -    | -    | +    | -          | +    | +    | AB           |
| WT17        | +    | +    | +    | +    | -    | +    | +    | +    | -    | +    | -    | -    | +          | -    | -    | AB           |
| WT18        | +    | -    | +    | +    | -    | +    | +    | +    | -    | -    | -    | +    | +          | -    | -    | AA           |
| MUT23       | +    | -    | +    | +    | +    | +    | +    | +    | +    | -    | -    | -    | +          | +    | +    | AB           |
| MUT24       | +    | -    | +    | +    | -    | +    | +    | +    | -    | -    | -    | +    | +          | -    | -    | AA           |
| WT22        | +    | -    | +    | +    | -    | +    | +    | +    | -    | -    | -    | +    | +          | -    | -    | AA           |
| WT24        | +    | +    | +    | +    | +    | +    | +    | +    | +    | +    | -    | +    | -          | +    | +    | AB           |
| MUT27       | +    | +    | +    | +    | -    | +    | +    | +    | -    | +    | -    | -    | +          | -    | -    | AB           |
| MUT30       | +    | +    | +    | +    | +    | +    | +    | +    | +    | +    | +    | -    | +          | -    | +    | AB           |
| WT29        | +    | +    | +    | +    | -    | +    | +    | +    | -    | +    | -    | +    | +          | -    | -    | AB           |

**Supplementary Table 4. List of 80 genes for targeted Next-Generation Sequencing.**

| N° | Gene           | Reference    | N° | Gene              | Reference    |
|----|----------------|--------------|----|-------------------|--------------|
| 1  | <i>ASXL1</i>   | NM_015338    | 41 | <i>KMT2A/MLL</i>  | NM_001197104 |
| 2  | <i>ASXL2</i>   | NM_018263    | 42 | <i>KMT2D/MLL2</i> | NM_003482    |
| 3  | <i>ATM</i>     | NM_000051    | 43 | <i>KRAS</i>       | NM_033360    |
| 4  | <i>ATRX</i>    | NM_000489    | 44 | <i>LIG4</i>       | NM_002312.3  |
| 5  | <i>BCOR</i>    | NM_017745    | 45 | <i>MDM4</i>       | NM_002393    |
| 6  | <i>BCORL1</i>  | NM_021946    | 46 | <i>MECOM</i>      | NM_001105078 |
| 7  | <i>BRAF</i>    | NM_004333    | 47 | <i>MPL</i>        | NM_005373    |
| 8  | <i>BRCA1</i>   | NM_007294    | 48 | <i>MYC</i>        | NM_002467    |
| 9  | <i>BRCA2</i>   | NM_000059    | 49 | <i>NF1</i>        | NM_001042492 |
| 10 | <i>BRCC3</i>   | NM_024332    | 50 | <i>NPM1</i>       | NM_002520    |
| 11 | <i>CALR</i>    | NM_004343    | 51 | <i>NRAS</i>       | NM_002524    |
| 12 | <i>CBL</i>     | NM_005188    | 52 | <i>PARN</i>       | NM_002582    |
| 13 | <i>CDAN1</i>   | NM_138477    | 53 | <i>PHF6</i>       | NM_001015877 |
| 14 | <i>CEBPA</i>   | NM_004364    | 54 | <i>PPM1D</i>      | NM_003620    |
| 15 | <i>CHEK2</i>   | NM_007194.3  | 55 | <i>PRPF8</i>      | NM_006445    |
| 16 | <i>CREBBP</i>  | NM_004380    | 56 | <i>PTEN</i>       | NM_00314     |
| 17 | <i>CSF3R</i>   | NM_156039    | 57 | <i>PTPN11</i>     | NM_002834    |
| 18 | <i>CTC1</i>    | NM_02599     | 58 | <i>RAD21</i>      | NM_006265    |
| 19 | <i>CTCF</i>    | NM_006565    | 59 | <i>RIT1</i>       | NM_006912    |
| 20 | <i>CUX1</i>    | NM_001913    | 60 | <i>RPL11</i>      | NM_000975    |
| 21 | <i>DDX41</i>   | NM_016222    | 61 | <i>RPL5</i>       | NM_000969    |
| 22 | <i>DKC1</i>    | NM_0001363.2 | 62 | <i>RTEL1</i>      | NM_032957    |
| 23 | <i>DNAJC21</i> | NM_001012339 | 63 | <i>RUNX1</i>      | NM_001754    |
| 24 | <i>DNMT3A</i>  | NM_022552    | 64 | <i>SAMD9</i>      | NM_017654    |
| 25 | <i>EP300</i>   | NM_001429    | 65 | <i>SAMD9L</i>     | NM_152703    |
| 26 | <i>ERCC6L2</i> | NM_001010895 | 66 | <i>SBDS</i>       | NM_016038    |
| 27 | <i>ETNK1</i>   | NM_018638    | 67 | <i>SETBP1</i>     | NM_015559    |
| 28 | <i>ETV6</i>    | NM_001987    | 68 | <i>SF1</i>        | NM_004630    |
| 29 | <i>EZH2</i>    | NM_004456    | 69 | <i>SF3B1</i>      | NM_012433    |
| 30 | <i>FLT3</i>    | NM_004119    | 70 | <i>SMC1A</i>      | NM_006306    |
| 31 | <i>GATA2</i>   | NM_032638    | 71 | <i>SMC3</i>       | NM_005445    |
| 32 | <i>GSKIP</i>   | NM_001271904 | 72 | <i>SRP72</i>      | NM_006947    |
| 33 | <i>HRAS</i>    | NM_005343    | 73 | <i>SRSF2</i>      | NM_003016    |
| 34 | <i>IDH1</i>    | NM_005896    | 74 | <i>STAG2</i>      | NM_001042749 |
| 35 | <i>IDH2</i>    | NM_002168    | 75 | <i>TET2</i>       | NM_001127208 |
| 36 | <i>IRF1</i>    | NM_002198    | 76 | <i>TP53</i>       | NM_001126112 |
| 37 | <i>JAK2</i>    | NM_004972    | 77 | <i>U2AF1</i>      | NM_006758    |
| 38 | <i>KDM5A</i>   | NM_001042603 | 78 | <i>U2AF2</i>      | NM_007279    |
| 39 | <i>KDM6A</i>   | NM_021140    | 79 | <i>WT1</i>        | NM_024426    |
| 40 | <i>KIT</i>     | NM_000222    | 80 | <i>ZRSR2</i>      | NM_005089    |



**Supplementary Table 5. Mutations association in the whole cohort according to *TET2/IDH* mutations.**

|           | All patients<br>(n = 63) | <i>IDH1/2<sup>MUT</sup></i><br>patients<br>(n = 28) | <i>TET2</i> mutation profile                      |                                                       | p=      |
|-----------|--------------------------|-----------------------------------------------------|---------------------------------------------------|-------------------------------------------------------|---------|
|           |                          |                                                     | <i>TET2<sup>MUT</sup></i><br>patients<br>(n = 28) | <i>TET2/IDH</i><br><sup>WT</sup> patients<br>(n = 30) |         |
| ASXL1     | 10                       | 0                                                   | 5                                                 | 5                                                     | NS      |
| ASXL2     | 1                        | 0                                                   | 1                                                 | 0                                                     | NS      |
| ATM       | 0                        | 0                                                   | 0                                                 | 0                                                     | NA      |
| ATRX      | 0                        | 0                                                   | 0                                                 | 0                                                     | NA      |
| BCOR      | 1                        | 0                                                   | 0                                                 | 1                                                     | NS      |
| BCORL1    | 0                        | 0                                                   | 0                                                 | 0                                                     | NA      |
| BRAF      | 0                        | 0                                                   | 0                                                 | 0                                                     | NA      |
| BRCA1     | 0                        | 0                                                   | 0                                                 | 0                                                     | NA      |
| BRCA2     | 0                        | 0                                                   | 0                                                 | 0                                                     | NA      |
| BRCC3     | 1                        | 0                                                   | 1                                                 | 0                                                     | NS      |
| CALR      | 0                        | 0                                                   | 0                                                 | 0                                                     | NA      |
| CBL       | 2                        | 0                                                   | 1                                                 | 1                                                     | NS      |
| CDAN1     | 0                        | 0                                                   | 0                                                 | 0                                                     | NA      |
| CEBPA     | 0                        | 0                                                   | 0                                                 | 0                                                     | NA      |
| CHEK2     | 0                        | 0                                                   | 0                                                 | 0                                                     | NA      |
| CREBBP    | 1                        | 0                                                   | 1                                                 | 0                                                     | NS      |
| CSF3R     | 1                        | 0                                                   | 0                                                 | 1                                                     | NS      |
| CTC1      | 0                        | 0                                                   | 0                                                 | 0                                                     | NA      |
| CTCF      | 1                        | 0                                                   | 1                                                 | 0                                                     | NS      |
| CUX1      | 2                        | 0                                                   | 2                                                 | 0                                                     | NS      |
| DDX41     | 1                        | 0                                                   | 0                                                 | 1                                                     | NS      |
| DKC1      | 0                        | 0                                                   | 0                                                 | 0                                                     | NA      |
| DNAJC21   | 0                        | 0                                                   | 0                                                 | 0                                                     | NA      |
| DNMT3A    | 3                        | 0                                                   | 2                                                 | 1                                                     | NS      |
| DOT1L     | 1                        | 0                                                   | 1                                                 | 0                                                     | NS      |
| EP300     | 0                        | 0                                                   | 0                                                 | 0                                                     | NA      |
| ERCC6L2   | 0                        | 0                                                   | 0                                                 | 0                                                     | NA      |
| ETNK1     | 0                        | 0                                                   | 0                                                 | 0                                                     | NA      |
| ETV6      | 1                        | 0                                                   | 0                                                 | 1                                                     | NS      |
| EZH2      | 2                        | 0                                                   | 0                                                 | 2                                                     | NS      |
| FLT3      | 0                        | 0                                                   | 0                                                 | 0                                                     | NA      |
| GATA2     | 0                        | 0                                                   | 0                                                 | 0                                                     | NA      |
| GSKIP     | 0                        | 0                                                   | 0                                                 | 0                                                     | NA      |
| HRAS      | 0                        | 0                                                   | 0                                                 | 0                                                     | NA      |
| IDH1      | 2                        | 2                                                   | 0                                                 | 0                                                     | NS      |
| IDH2      | 3                        | 3                                                   | 0                                                 | 0                                                     | NS      |
| IRF1      | 0                        | 0                                                   | 0                                                 | 0                                                     | NA      |
| JAK2      | 4                        | 0                                                   | 2                                                 | 2                                                     | NS      |
| KDM5A     | 0                        | 0                                                   | 0                                                 | 0                                                     | NA      |
| KDM6A     | 0                        | 0                                                   | 0                                                 | 0                                                     | NA      |
| KIT       | 0                        | 0                                                   | 0                                                 | 0                                                     | NA      |
| KMT2A/MLL | 1                        | 0                                                   | 1                                                 | 0                                                     | NS      |
| KMT2D/MLL | 1                        | 0                                                   | 1                                                 | 0                                                     | NS      |
| KRAS      | 3                        | 0                                                   | 2                                                 | 1                                                     | NS      |
| LIG4      | 0                        | 0                                                   | 0                                                 | 0                                                     | NA      |
| MDM4      | 0                        | 0                                                   | 0                                                 | 0                                                     | NA      |
| MECOM     | 0                        | 0                                                   | 0                                                 | 0                                                     | NA      |
| MPL       | 0                        | 0                                                   | 0                                                 | 0                                                     | NA      |
| MYC       | 0                        | 0                                                   | 0                                                 | 0                                                     | NA      |
| NF1       | 1                        | 1                                                   | 0                                                 | 0                                                     | NA      |
| NPM1      | 0                        | 0                                                   | 0                                                 | 0                                                     | NA      |
| NRAS      | 2                        | 0                                                   | 1                                                 | 1                                                     | NS      |
| PARN      | 0                        | 0                                                   | 0                                                 | 0                                                     | NA      |
| PHF6      | 5                        | 0                                                   | 5                                                 | 0                                                     | 0,0214  |
| PPM1D     | 0                        | 0                                                   | 0                                                 | 0                                                     | NA      |
| PRPF8     | 0                        | 0                                                   | 0                                                 | 0                                                     | NA      |
| PTEN      | 0                        | 0                                                   | 0                                                 | 0                                                     | NA      |
| PTPN11    | 1                        | 0                                                   | 0                                                 | 1                                                     | NS      |
| RAD21     | 1                        | 0                                                   | 1                                                 | 0                                                     | NS      |
| RIT1      | 0                        | 0                                                   | 0                                                 | 0                                                     | NA      |
| RPL11     | 0                        | 0                                                   | 0                                                 | 0                                                     | NA      |
| RPL5      | 0                        | 0                                                   | 0                                                 | 0                                                     | NA      |
| RTEL1     | 0                        | 0                                                   | 0                                                 | 0                                                     | NA      |
| RUNX1     | 1                        | 0                                                   | 1                                                 | 0                                                     | ns      |
| SAMD9     | 0                        | 0                                                   | 0                                                 | 0                                                     | NA      |
| SAMD9L    | 0                        | 0                                                   | 0                                                 | 0                                                     | NA      |
| SBDS      | 0                        | 0                                                   | 0                                                 | 0                                                     | NA      |
| SETBP1    | 0                        | 0                                                   | 0                                                 | 0                                                     | NA      |
| SF1       | 0                        | 0                                                   | 0                                                 | 0                                                     | NA      |
| SF3B1     | 11                       | 0                                                   | 5                                                 | 6                                                     | NS      |
| SMC1A     | 0                        | 0                                                   | 0                                                 | 0                                                     | NA      |
| SMC3      | 2                        | 0                                                   | 2                                                 | 0                                                     | NS      |
| SRP72     | 0                        | 0                                                   | 0                                                 | 0                                                     | NA      |
| SRSF2     | 13                       | 4                                                   | 8                                                 | 1                                                     | 0,0107  |
| STAG2     | 0                        | 0                                                   | 0                                                 | 0                                                     | NA      |
| TET2      | 28                       | 0                                                   | 28                                                | 0                                                     | <0,0001 |
| TP53      | 4                        | 0                                                   | 2                                                 | 2                                                     | NS      |
| U2AF1     | 4                        | 0                                                   | 0                                                 | 4                                                     | NS      |
| U2AF2     | 0                        | 0                                                   | 0                                                 | 0                                                     | NA      |
| WT1       | 0                        | 0                                                   | 0                                                 | 0                                                     | NA      |
| ZRSR2     | 3                        | 0                                                   | 3                                                 | 0                                                     | ns      |

Fisher's exact test has been realized NS: Not Significant NA: Not Applicable

**Supplementary Table 6. NGS at diagnosis in WMC and in NK/T sorted cells.**

|                                                                   | VAF<br>White Mononuclear<br>Cells | VAF NK Cells           |       |       | VAF<br>T Cells | %KIR2D+<br>NK cells |
|-------------------------------------------------------------------|-----------------------------------|------------------------|-------|-------|----------------|---------------------|
|                                                                   |                                   | Whole                  | KIR-* | KIR+* |                |                     |
| <b>MUT22</b>                                                      |                                   |                        |       |       |                |                     |
|                                                                   | Blood 28/02/2017                  | Blood 31/10/2017       |       |       |                | 0,60%               |
| TET2:NM_001127208:exon11:c.4669_4672delp.V1557fs                  | 42                                | 50                     | NA    | NA    | -              |                     |
| SRSF2:NM_001195427:exon1:c.C284T:p.P95L                           | 42                                | 45                     | NA    | NA    | -              |                     |
| TET2:NM_001127208:exon6:c.C3646T:p.R1216X                         | 26                                | -                      | NA    | NA    | -              |                     |
| TET2:NM_001127208:exon7:c.T3898G:p.F1300V                         | 14                                | 54                     | NA    | NA    | -              |                     |
| ASXL2:NM_018263:exon12:c.1966_1976delp.T656fs                     | -                                 | 2                      | NA    | NA    | -              |                     |
| NRAS:NM_002524:exon2:c.G35A:p.G12D                                | -                                 | 15                     | NA    | NA    | -              |                     |
| RIT1:NM_006912:exon4:c.G229C:p.A77P                               | -                                 | 7                      | NA    | NA    | -              |                     |
| <b>MUT33</b>                                                      |                                   |                        |       |       |                |                     |
|                                                                   | Bone Marrow 19/04/2017            | Blood 09/01/2018       |       |       |                | 2,70%               |
| PHF6:NM_001015877:exon2:c.65_66insTA:p.S22fs                      | 91                                | 93                     | NA    | NA    | -              |                     |
| TET2:NM_001127208:exon11:c.4895delA:p.Q1632fs                     | 42                                | 48                     | NA    | NA    | -              |                     |
| TET2:NM_001127208:exon10:c.4400delG:p.R1467fs                     | 41                                | 43                     | NA    | NA    | -              |                     |
| <b>MUT08</b>                                                      |                                   |                        |       |       |                |                     |
|                                                                   | Blood 18/07/2017                  | Blood 18/07/2017       |       |       |                | 10,20%              |
| TET2:NM_001127208:exon9:c.G4108A:p.G1370R                         | 22                                | 49                     | 42    | 48    | -              |                     |
| TET2:NM_001127208:exon3:c.A17delA:p.P139fs                        | 22                                | 33                     | 37    | 2     | -              |                     |
| SF3B1:NM_012433:exon15:c.A2098G:p.K700E                           | 22                                | 31                     | 33    | 4     | -              |                     |
| TET2:NM_001127208:intron8:c.4044+2T>A                             | 3                                 | 6                      | 8     | -     | -              |                     |
| <b>MUT18</b>                                                      |                                   |                        |       |       |                |                     |
|                                                                   | Bone Marrow 24/03/2010            | Blood 06/03/2018       |       |       |                | 10,70%              |
| TET2:NM_001127208:exon3:c.2050delC:p.Q684fs                       | 36                                | 40                     | NA    | NA    | 7              |                     |
| TET2:NM_001127208:exon11:c.5306_5307msTCCGGGCATG:p.A1769fs        | 34                                | 34                     | NA    | NA    | 4              |                     |
| TET2:NM_001127208:exon 3 c.658_663delCACACAinsGAACTTC : p.H220Efs | 3                                 | -                      | NA    | NA    | -              |                     |
| TET2:NM_001127208:exon 7 c.3955-2A>G                              | 2                                 | -                      | NA    | NA    | -              |                     |
| KRAS:NM_033360:exon2:c.G34A:p.G12S                                |                                   | 12                     | NA    | NA    | -              |                     |
| <b>MUT24</b>                                                      |                                   |                        |       |       |                |                     |
|                                                                   | Bone Marrow 23/06/16              | Bone Marrow 23/06/2016 |       |       |                | 37,20%              |
| ASXL1:NM_015338:exon12:c.1927dupG:p.G642fs                        | 3                                 | 6                      | 6     | 3     | -              |                     |
| TET2:NM_001127208:exon7:c.T3860C:p.F1287S                         | 2                                 | 11                     | 11    | 7     | -              |                     |
| SF3B1:NM_012433:exon14:c.C1984T:p.H662Y                           | 31                                | 19                     | 20    | 12    | -              |                     |
| <b>MUT23</b>                                                      |                                   |                        |       |       |                |                     |
|                                                                   | Bone Marrow 08/12/16              | Bone Marrow 08/12/2016 |       |       |                | 45,90%              |
| TET2:NM_001127208:exon11:c.G5606A:p.G1869E                        | 49                                | 19                     | 9     | 8     | -              |                     |
| TET2:NM_001127208:exon11:c.T5625A:p.C1875X                        | 49                                | 5                      | 8     | 13    | -              |                     |
| TET2:NM_001127208:exon11:c.5062_5063delp.S1688fs                  | -                                 | -                      | 22    | 15    | -              |                     |
| TET2:NM_001127208:exon3:c.C1642T:p.Q548X                          | -                                 | -                      | 6     | -     | -              |                     |
| SRSF2:NM_003016:exon1:c.C284T:p.P95L                              | 49                                | 14                     | 29    | 23    | -              |                     |
| <b>MUT32</b>                                                      |                                   |                        |       |       |                |                     |
|                                                                   | 12/08/2016                        | Blood 28/12/2017       |       |       |                | 47,90%              |
| TET2:NM_001127208:exon11:c.A5603G:p.H1868R                        | 46                                | 17                     | 39    | 3     | -              |                     |
| TET2:NM_001127208:exon11:c.A5770G:p.K1924E                        | 41                                | 20                     | 36    | 1     | -              |                     |
| SF3B1:NM_012433:exon15:c.A2098G:p.K700E                           | 44                                | 20                     | 34    | -     | -              |                     |
| <b>MUT19</b>                                                      |                                   |                        |       |       |                |                     |
|                                                                   | Blood 08/03/17                    | Blood 11/01/2018       |       |       |                | 56,90%              |
| TET2:NM_001127208:exon3:c.C1642T:p.Q548X                          | 32                                | 2                      | 14    | -     | -              |                     |
| TET2:NM_001127208:exon11:c.5060_5061delp.Q1687fs                  | 33                                | 21                     | 31    | 9     | -              |                     |
| SRSF2:NM_003016:exon1:c.C284A:p.P95H                              | 33                                | 20                     | 29    | 23    | -              |                     |
| TET2:NM_001127208:exon11:c.5315delT:p.M1772fs                     | -                                 | 4                      | -     | -     | -              |                     |
| <b>MUT31</b>                                                      |                                   |                        |       |       |                |                     |
|                                                                   | Bone Marrow 14/12/17              | Blood 10/03/2016       |       |       |                | 69,10%              |
| TET2:NM_001127208:exon7:c.G3818C:p.C1273S                         | 34                                | 4                      | NA    | NA    | -              |                     |
| TET2:NM_001127208:exon5:c.T3577A:p.C1193S                         | 38                                | 6                      | NA    | NA    | -              |                     |
| SRSF2:NM_003016:exon1:c.C284A:p.P95H                              | 27                                | 4                      | NA    | NA    | -              |                     |
| CTCF:NM_006565:exon5:c.C1024T:p.R342C                             | -                                 | -                      | NA    | NA    | -              |                     |
| TET2:NM_001127208:exon3:c.1693_1697delp.I565fs                    | -                                 | 10                     | NA    | NA    | -              |                     |
| <b>MUT14</b>                                                      |                                   |                        |       |       |                |                     |
|                                                                   | Blood 22/11/16                    | Blood 19/12/2017       |       |       |                | 92,90%              |
| TET2:NM_001127208:exon10:c.C4354T:p.R1452X                        | 16                                | -                      | NA    | NA    | -              |                     |
| TET2:NM_001127208:exon11:c.5544delA:p.S1848fs                     | 16                                | -                      | NA    | NA    | -              |                     |
| PHF6:NM_001015877:exon7:c.T724A:p.C242S                           | 10                                | -                      | NA    | NA    | -              |                     |

\*KIR = KIR2D / KIR3DL1 / KIR3DL2

WMC, Whole mononuclear cell; VAF variant allele frequency

**Supplementary Table 7. Patients' characteristics.**

| Variables                           | All patients (n = 63) | Non <i>TET2/IDH</i> mutated patients (n = 30) | <i>TET2</i> mutated patients (n = 28) | p=     | <i>IDH</i> mutated patients (n = 5) |
|-------------------------------------|-----------------------|-----------------------------------------------|---------------------------------------|--------|-------------------------------------|
| <b>Age at MDS/CMML diagnostic</b>   | 70 [63-75]            | 71 [62.75-75]                                 | 70 [51-86]                            | ns     | 73 [59-84.5]                        |
| <b>% women</b>                      | 38                    | 40                                            | 36                                    | ns     | 40                                  |
| <b>Peripheral blood</b>             |                       |                                               |                                       |        |                                     |
| Hb at diagnosis (g/dL)              | 11.45 [9.35-13.5]     | 10.15 [9.05-11.88]                            | 13.3 [10.3-14.45]                     | 0.0032 | 11.2 [9.1-13.4]                     |
| Platelets at diagnosis (G/L)        | 129.5 [89.25-286.8]   | 124.5 [89.5-369.5]                            | 115 [85-223.5]                        | ns     | 155 [108-325.5]                     |
| WBC at diagnosis (G/L)              | 4.8 [3.9-7.4]         | 4.65 [3.9-7.0]                                | 5 [3.8-7.6]                           | ns     | 5.05 [3.6-7.55]                     |
| ANC at diagnosis (G/L)              | 2.7 [1.8-4.2]         | 2.8 [2.2-4.675]                               | 2.2 [0.6-3.95]                        | ns     | 1.8 [1.25-4.75]                     |
| Lymphocyte count at diagnosis (G/L) | 1.250 [0.9-1.9]       | 1.2 [0.9-1.7]                                 | 1.5 [1.125-2.45]                      | ns     | 0.4 [0.2-1.3]                       |
| Peripheral blast % at diagnosis (%) | 0 [0-0]               | 0 [0-0]                                       | 0 [0-0]                               | ns     | 0 [0-0]                             |
| <b>Bone Marrow</b>                  |                       |                                               |                                       |        |                                     |
| SLD/MLD*                            | 25                    | 17                                            | 6                                     | ns     | 2                                   |
| RS-SLD/RS-MLD*                      | 10                    | 5                                             | 5                                     | ns     | 0                                   |
| EB1*                                | 8                     | 4                                             | 4                                     | ns     | 0                                   |
| EB2*                                | 1                     | 1                                             | 0                                     | ns     | 0                                   |
| CMML*                               | 17                    | 2                                             | 12                                    | 0.0018 | 3                                   |
| Other MDS/MPN                       | 0                     | 0                                             | 0                                     | N.A    | 0                                   |
| 5q.*                                | 2                     | 1                                             | 1                                     | ns     | 0                                   |
| Unknown                             | 0                     | 0                                             | 0                                     | N.A    | 0                                   |
| Medullary blasts (%)                | 3 [2.0-4.0]           | 3 [2.0-4.0]                                   | 3 [1.0-4.0]                           | ns     | 3 [2-3.5]                           |
| <b>IPSS-R</b>                       |                       |                                               |                                       |        |                                     |
| Low                                 | 52                    | 24                                            | 23                                    | ns     | 5                                   |
| High                                | 11                    | 6                                             | 5                                     | ns     | 0                                   |
| <b>Treatments</b>                   | 14                    | 5                                             | 7                                     | ns     | 2                                   |
| Prednisone                          | 4                     | 1                                             | 1                                     | ns     | 2                                   |
| Lenalidomid                         | 4                     | 3                                             | 1                                     | ns     | 0                                   |
| Rigosertib                          | 1                     | 0                                             | 1                                     | N.A    | 0                                   |
| Eltrombopag                         | 1                     | 0                                             | 1                                     | N.A    | 0                                   |
| Darbepoietin                        | 4                     | 1                                             | 3                                     | ns     | 0                                   |

\*SLD = MDS with single-lineage dysplasia; MLD = MDS with multilineage dysplasia; RS-SLD = MDS with ring sideroblasts and with single-lineage dysplasia; RS-MLD = MDS with ring sideroblasts and with multilineage dysplasia); MPN = Myeloproliferative Neoplasm; del5q = MDS with isolated del(5q); EB1 = MDS with excess blasts (5 to 9 percent blasts in the bone marrow or 2 to 4 percent blasts in the blood); EB2 = MDS with excess blasts (10 to 19 percent blasts in the bone marrow or 5 to 19 percent blasts in the blood); CMML = Chronic Myelomonocytic Leukemia.

**Supplementary Table 8. Patients of the Clinical Trial NCT02985190**

| Code  | Patient number (in Mekinian et al. Leukemia 2022) | Age | Sex | WHO 2016 classification* | Karyotype                          | Mutations (Targeted NGS)            | IPSS-R |
|-------|---------------------------------------------------|-----|-----|--------------------------|------------------------------------|-------------------------------------|--------|
| MUT34 | #24                                               | 73  | F   | MDS-U                    | 45,X,-Y[19]/46,XY[5]               | <i>TET2, ASXL1, CBL, JAK2, PHF6</i> | 2.0    |
| MUT35 | #14                                               | 72  | M   | MDS-EB2                  | 46,xy[20]                          | <i>TET2, DNMT3A, TP53</i>           | 9.0    |
| MUT36 | #18                                               | 86  | F   | CMML-1                   | 46,XY,del(20)(q11q13)[1]/46,XY[1]  | <i>TET2, NRAS, KRAS, CBL</i>        | 2.0    |
| WT31  | #21                                               | 77  | F   | CMML-2                   | 46,XXdel(5)(q13q33)                | <i>SF3B1, NRAS, RUNX1, SETBP1</i>   | 4.5    |
| WT32  | #29                                               | 76  | M   | MDS-MLD                  | 46,XY,del(13)(q13q21)[3]/46,XY[17] | <i>UBA1</i>                         | 2.0    |
| WT33  | #26                                               | 68  | M   | MDS-MLD                  | 46,X,inv(Y)(p11q12)c[20]           | <i>UBA1</i>                         | 4.5    |
| WT34  | #16                                               | 69  | M   | MDS-MLD                  | 46,XX,del(3)(p21)[3]/46,XX[20]     | <i>UBA1</i>                         | 1.0    |
| WT35  | #22                                               | 82  | M   | MDS-MLD                  | 92,XXXX[3] / 46,XX[17]             | <i>UBA1</i>                         | 3      |
| WT36  | #11                                               | 82  | M   | MDS-MLD                  | 45,X,-Y[20]                        | <i>DNMT3A</i>                       | 2.5    |
| WT37  | #16                                               | 69  | M   | MDS-MLD                  | 46,XX,del(3)(p21)[3]/46,XX[20]     | <i>UBA1</i>                         | 1.0    |

\*SLD = MDS with single-lineage dysplasia; MLD = MDS with multilineage dysplasia; RS-SLD = MDS with ring sideroblasts and with single-lineage dysplasia; RS-MLD = MDS with ring sideroblasts and with multilineage dysplasia; del5q = MDS with isolated del(5q); EB1 = MDS with excess blasts (5 to 9 percent blasts in the bone marrow or 2 to 4 percent blasts in the blood); EB2 = MDS with excess blasts (10 to 19 percent blasts in the bone marrow or 5 to 19 percent blasts in the blood). CMML-1 = Chronic Myelomonocytic Leukemia (5 to 9 percent blasts in the bone marrow or 2 to 4 percent blasts in the blood). CMML-2 = Chronic Myelomonocytic Leukemia (10 to 19 percent blasts in the bone marrow or 5 to 19 percent blasts in the blood).

**Supplementary Table 9. List of Antibodies used for Flow Cytometry.**

| Target                   | Conjugation  | Clone   | Supplier  | Reference   |
|--------------------------|--------------|---------|-----------|-------------|
| CD3                      | FITC         | OKT3    | Biologend | 317306      |
| CD3                      | V450         | UCHT1   | BD        | 560365      |
| CD3                      | BB700        | SK7     | BD        | 566575      |
| CD4                      | FITC         | OKT4    | Biologend | 317408      |
| CD4                      | APC-H7       | RPA-T4  | BD        | 560158      |
| CD5                      | FITC         | UCHT2   | Biologend | 300606      |
| CD7                      | PE-CF594     | M-T701  | BD        | 562541      |
| CD7                      | APC          | CD7-6B7 | Miltenyi  | 130-105-841 |
| CD8                      | BV785        | SK1     | Biologend | 344740      |
| CD14                     | FITC         | M5E2    | BD        | 555397      |
| CD16                     | BUV395       | 3G8     | BD        | 563785      |
| CD16                     | APC-H7       | 3G8     | BD        | 560715      |
| CD16                     | BV711        | 3G8     | BD        | 563127      |
| CD19                     | FITC         | HIB19   | Biologend | 302206      |
| CD33                     | PE           | WM53    | BD        | 555450      |
| CD56                     | AF700        | B159    | BD        | 557919      |
| CD56                     | PE-Cy7       | B159    | BD        | 557747      |
| CD56                     | BV421        | HCD56   | Biologend | 318328      |
| CD57                     | BV605        | QA17A04 | Biologend | 393304      |
| CD69                     | BUV737       | FN50    | BD        | 564439      |
| CD85j                    | PE-Cy5       | GHI/75  | BD        | 551054      |
| CD96                     | APC          | NK92.39 | Biologend | 338410      |
| CD107a                   | APC-H7       | H4A3    | BD        | 561343      |
| DNAM-1                   | PE-Vio770    | REA1040 | Miltenyi  | 130-099-966 |
| KLRG1                    | APC-Vio770   | REA260  | Miltenyi  | 130-103-642 |
| NKG2A                    | BV786        | 131411  | BD        | 747917      |
| NKG2D                    | BV650        | 1D11    | BD        | 563408      |
| NKp30                    | BV421        | p30-15  | BD        | 563385      |
| NKp46                    | BV786        | 9-E2    | BD        | 563329      |
| CD127                    | PE-Cy7       | A019D5  | Biologend | 351320      |
| IFN- $\gamma$            | AF488        | B27     | BD        | 557718      |
| CD158a (KIR2DL1)         | APC          | REA284  | Miltenyi  | 130-103-935 |
| CD158b (KIR2DL2/DL3)     | BB700        | CH-L    | BD        | 746236      |
| CD158d (KIR2DL4)         | PE           | REA768  | Miltenyi  | 130-112-465 |
| CD158e/k (KIR3DL1/DL2)   | PE           | 5.133   | Miltenyi  | 130-095-205 |
| CD158e/k (KIR3DL1/DL2)   | APC-Vio770   | REA970  | Miltenyi  | 130-116-181 |
| CD158e1/e2 (KIR3DL1/DS1) | PerCP-Vio700 | REA168  | Miltenyi  | 130-104-837 |
| CD158f (KIR2DL5)         | PE-Vio770    | REA955  | Miltenyi  | 130-115-841 |
| CD158i (KIR2DS4)         | VioBlue      | REA860  | Miltenyi  | 130-114-622 |
| KIR2D (all KIR2D)        | PE           | NKVFS1  | Miltenyi  | 130-092-688 |
| KIR2D (all KIR2D)        | APC          | NKVFS1  | Miltenyi  | 130-092-687 |

**Supplementary Table 10. List of primers used for the ChIP-qPCR assay**

| <b>ID</b>            | <b>Sequence</b>      |
|----------------------|----------------------|
| CRE Forward          | GGGGAGGGCAGTTTCCGTC  |
| CRE Reverse          | GGTCATGGCGTCTCCTCTGC |
| KIR2DL1 Forward      | GGCCTCATGCAAGGTAGAAA |
| KIR2DL1 reverse      | CCCTCCCTCTATTGCTTTCC |
| KIR2DL2/DL3 Forward  | CTCTTGAGCGAGCACCCAC  |
| KIR2DL1prom2 Reverse | CACCAACACACACCATGCTG |

**Supplemental Table 11. Specificities and primers used in the Multiplex RT-PCR analysis.**

| <b>Target Gene</b> | <b>Reference</b> | <b>Target Gene</b> | <b>Reference</b> |
|--------------------|------------------|--------------------|------------------|
| <i>TET2</i>        | Hs00325999_m1    | <i>IKZF3</i>       | Hs05037772_s1    |
| <i>IDH1</i>        | Hs00271858_m1    | <i>ZBTB16</i>      | Hs00232313_m1    |
| <i>IDH2</i>        | Hs00158033_m1    | <i>IRF2</i>        | Hs01082884_m1    |
| <i>CXCL10</i>      | Hs00171042_m1    | <i>JUN</i>         | Hs01103582_s1    |
| <i>RUNX1</i>       | Hs01021970_m1    | <i>FOS</i>         | Hs99999140_m1    |
| <i>MYC</i>         | Hs00153408_m1    | <i>DUSP5</i>       | Hs00244839_m1    |
| <i>DNMT3A</i>      | Hs01027166_m1    | <i>EOMES</i>       | Hs00172872_m1    |
| <i>TET1</i>        | Hs00286756_m1    | <i>NFIL3</i>       | Hs00705412_s1    |
| <i>TET3</i>        | Hs00379125_m1    | <i>PRDM1</i>       | Hs00153357_m1    |
| <i>PRF1</i>        | Hs00169473_m1    | <i>STAT3</i>       | Hs00374280_m1    |
| <i>GZMA</i>        | Hs00989184_m1    | <i>STAT4</i>       | Hs01028017_m1    |
| <i>GZMB</i>        | Hs00188051_m1    | <i>STAT5B</i>      | Hs00560026_m1    |
| <i>GZMK</i>        | Hs00157878_m1    | <i>STAT6</i>       | Hs00598625_m1    |
| <i>GZMH</i>        | Hs00277212_m1    | <i>ID2</i>         | Hs04187239_m1    |
| <i>INFG</i>        | Hs00989291_m1    | <i>ID3</i>         | Hs00171409_m1    |
| <i>TNF</i>         | Hs00174128_m1    | <i>BCL6</i>        | Hs00153368_m1    |
| <i>BCL2</i>        | Hs00608023_m1    | <i>ZEB1</i>        | Hs01566410_m1    |
| <i>KIR2DL1</i>     | Hs04961778_gH    | <i>ZEB2</i>        | Hs00207691_m1    |
| <i>KIR2DL2</i>     | Hs04961776_uH    | <i>BCL6</i>        | Hs00158218_m1    |
| <i>KIR2DL3</i>     | Hs04961777_gH    | <i>LEF1</i>        | Hs01547250_m1    |
| <i>KIR2DL4</i>     | Hs00427106_m1    | <i>TCF7</i>        | Hs00175273_m1    |
| <i>KIR3DL1</i>     | Hs01592437_m1    | <i>TNFRSF18</i>    | Hs00188346_m1    |
| <i>KIR3DL2</i>     | Hs00601497_gH    | <i>EZH2</i>        | Hs00544830_m1    |
| <i>KIR3DL3</i>     | Hs00601067_m1    | <i>MYB</i>         | Hs00920556_m1    |
| <i>CXCR4</i>       | Hs00976734_m1    | <i>GAPDH</i>       | Hs99999905_m1    |
| <i>ACKR3</i>       | Hs00664172_s1    | <i>ACTB</i>        | Hs99999903_m1    |
| <i>ITGA4</i>       | Hs00168433_m1    | <i>RPL27</i>       | Hs03044961_g1    |
| <i>KLRC1</i>       | Hs00970273_g1    | <i>NCAM1</i>       | Hs00941830_m1    |
| <i>CD96</i>        | Hs00976975_m1    | <i>FCGR3B</i>      | Hs04334165_m1    |
| <i>CD69</i>        | Hs00934033_m1    | <i>CD3E</i>        | Hs01062241_m1    |
| <i>KLRG1</i>       | Hs00195153_m1    | <i>CD4</i>         | Hs01058407_m1    |
| <i>CXCR3</i>       | Hs01847760_s1    | <i>CD8B</i>        | Hs00174762_m1    |
| <i>CCR2</i>        | Hs00704702_s1    | <i>CD33</i>        | Hs00233544_m1    |
| <i>NCR2</i>        | Hs00183113_m1    | <i>CD5</i>         | Hs00204397_m1    |
| <i>NCR3</i>        | Hs00394809_m1    | <i>CD7</i>         | Hs00196191_m1    |
| <i>NCR1</i>        | Hs00183118_m1    | <i>SPI1</i>        | Hs02786711_m1    |
| <i>TIGIT</i>       | Hs00545087_m1    | <i>NT5E</i>        | Hs00159686_m1    |
| <i>CD226</i>       | Hs00170832_m1    | <i>ENTPD1</i>      | Hs00969556_m1    |
| <i>IL2RA</i>       | Hs00907777_m1    | <i>CTLA4</i>       | Hs00175480_m1    |
| <i>IL7R</i>        | Hs00902334_m1    | <i>HAVCR2</i>      | Hs00958618_m1    |
| <i>IL15RA</i>      | Hs00542602_g1    | <i>PDCD1</i>       | Hs01550088_m1    |
| <i>AHR</i>         | Hs00169233_m1    | <i>LAG3</i>        | Hs00958444_g1    |
| <i>CYP11A1</i>     | Hs01054796_g1    | <i>CD244</i>       | Hs00175569_m1    |
| <i>NQO1</i>        | Hs01045993_g1    | <i>FNI</i>         | Hs01549976_m1    |
| <i>TBX21</i>       | Hs00203436_m1    | <i>CD44</i>        | Hs01075864_m1    |
| <i>FOXO1</i>       | Hs00231106_m1    | <i>ITGA4</i>       | Hs00168433_m1    |
| <i>FOXO3</i>       | Hs00818121_m1    | <i>ITGB1</i>       | Hs01127536_m1    |
| <i>ELF4</i>        | Hs01086126_m1    | <i>SELL</i>        | Hs00174151_m1    |
