# Supplementary material for: Myelodysplastic Syndrome associated TET2 mutations affect NK cell function and genome methylation
Source: PubMed Central journal article supplement (PMC9898569; doi:10.1038/s41467-023-36193-w), 2023-02-03
Supplement: 41467_2023_36193_MOESM2_ESM.pdf [file 41467_2023_36193_MOESM2_ESM.pdf]

# **Myelodysplastic Syndrome associated TET2 mutations affect NK cell function and genome methylation**

## **Description of Additional Supplementary Files**

File Name: Supplementary Data1.

Description: MDS/CMML patients' individual clinical information.

File Name: Supplementary Data 2.

Description: List of 15,827 Differentially Methylated Sites.

File Name: Supplementary Data 3.

Description: List of 117 Differentially Methylated Genes.
